# Supplementary material for: Effects of Granule Size Ranges on Dazomet Degradation and Its Persistence with Different Environmental Factors
Source: MDPI journal article supplement (doi:10.3390/agriculture12050674), 2022-05-09
Supplement: s1 [file s1]

**Table S1.** Effects of application dosage on the degradation characteristics of DZ with different granule size ranges.

| Granule size range<br>( $\mu\text{m}$ ) | Dosage (mg/kg) | Rate constant ( <i>k</i> ) | Half-life $t_{1/2}$ (d) | $r^2$  |
|-----------------------------------------|----------------|----------------------------|-------------------------|--------|
| >400                                    | 360            | 0.147 $\pm$ 0.003 c        | 4.714                   | 0.9571 |
|                                         | 180            | 0.308 $\pm$ 0.009 b        | 2.250                   | 0.9362 |
|                                         | 90             | 0.597 $\pm$ 0.025 a        | 1.161                   | 0.9138 |
| 300-400                                 | 360            | 0.169 $\pm$ 0.012 c        | 4.101                   | 0.9777 |
|                                         | 180            | 0.332 $\pm$ 0.020 b        | 2.087                   | 0.9380 |
|                                         | 90             | 0.475 $\pm$ 0.022 a        | 1.459                   | 0.9657 |
| 100-300                                 | 360            | 0.203 $\pm$ 0.015 c        | 3.414                   | 0.9317 |
|                                         | 180            | 0.439 $\pm$ 0.022 b        | 1.579                   | 0.8983 |
|                                         | 90             | 0.512 $\pm$ 0.024 a        | 1.354                   | 0.9512 |
| <100                                    | 360            | 0.206 $\pm$ 0.015 b        | 3.364                   | 0.9436 |
|                                         | 180            | 0.570 $\pm$ 0.080 a        | 1.216                   | 0.8622 |
|                                         | 90             | 0.575 $\pm$ 0.043 a        | 1.205                   | 0.8623 |
| SD                                      | 360            | 0.242 $\pm$ 0.017 c        | 2.864                   | 0.8680 |
|                                         | 180            | 0.857 $\pm$ 0.006 b        | 0.809                   | 0.9923 |
|                                         | 90             | 1.005 $\pm$ 0.111 a        | 0.690                   | 0.9901 |

SD = stock solution with DZ dissolved in acetone. Means (N = 3) within the same column followed by the same letter are not statistically different ( $P < 0.05$ ) according to Duncan's new Multiple-Range test.

**Table S2.** Fitting results for half-life values of DZ granule size range as a function of temperature.

| Granule size ranges<br>( $\mu\text{m}$ ) | Fitting equation             | $r^2$ | <i>p</i> |
|------------------------------------------|------------------------------|-------|----------|
| >400                                     | $t_{1/2} = -0.319T + 11.807$ | 0.902 | <0.05    |
| 300-400                                  | $t_{1/2} = -0.248T + 9.312$  | 0.906 | <0.05    |
| 100-300                                  | $t_{1/2} = -0.195T + 7.236$  | 0.857 | <0.05    |
| <100                                     | $t_{1/2} = -0.149T + 5.720$  | 0.861 | <0.05    |
| SD                                       | $t_{1/2} = -0.087T + 3.453$  | 0.857 | <0.05    |

**Table S3.** Effects of temperature on the degradation characteristics of DZ with different granule size ranges.

| Temperature<br>( $^{\circ}\text{C}$ ) | Granule size<br>ranges ( $\mu\text{m}$ ) | Rate constant ( <i>k</i> ) | Half-life $t_{1/2}$ (d) | $r^2$  |
|---------------------------------------|------------------------------------------|----------------------------|-------------------------|--------|
| 35                                    | >400                                     | 0.414 $\pm$ 0.003 c        | 1.674                   | 0.9317 |
|                                       | 300-400                                  | 0.472 $\pm$ 0.018 c        | 1.468                   | 0.9234 |
|                                       | 100-300                                  | 0.578 $\pm$ 0.014 b        | 1.199                   | 0.8967 |
|                                       | <100                                     | 0.625 $\pm$ 0.014 b        | 1.109                   | 0.9289 |
|                                       | SD                                       | 0.912 $\pm$ 0.029 a        | 0.760                   | 0.9888 |
| 25                                    | >400                                     | 0.308 $\pm$ 0.009 d        | 2.250                   | 0.9362 |
|                                       | 300-400                                  | 0.332 $\pm$ 0.020 d        | 2.087                   | 0.9380 |
|                                       | 100-300                                  | 0.469 $\pm$ 0.022 c        | 1.479                   | 0.8983 |
|                                       | <100                                     | 0.570 $\pm$ 0.080 b        | 1.216                   | 0.8622 |
|                                       | SD                                       | 0.857 $\pm$ 0.006 a        | 0.809                   | 0.9923 |
| 15                                    | >400                                     | 0.098 $\pm$ 0.003 e        | 7.071                   | 0.9505 |
|                                       | 300-400                                  | 0.132 $\pm$ 0.004 d        | 5.250                   | 0.9818 |
|                                       | 100-300                                  | 0.185 $\pm$ 0.006 c        | 3.747                   | 0.9825 |
|                                       | <100                                     | 0.215 $\pm$ 0.009 b        | 3.223                   | 0.9483 |
|                                       | SD                                       | 0.348 $\pm$ 0.012 a        | 1.991                   | 0.9416 |
|                                       | >400                                     | 0.063 $\pm$ 0.003 e        | 11.000                  | 0.9716 |
|                                       | 300-400                                  | 0.078 $\pm$ 0.006 d        | 8.885                   | 0.9561 |

|   |         |               |       |        |
|---|---------|---------------|-------|--------|
| 4 | 100-300 | 0.098±0.004 c | 7.071 | 0.9667 |
|   | <100    | 0.125±0.008 b | 5.544 | 0.9533 |
|   | SD      | 0.207±0.010 a | 3.354 | 0.8835 |

SD = DZ in acetone. Means (N = 3) within the same column followed by the same letter are not statistically different (P < 0.05) according to Duncan's new Multiple-Range test.

**Table S4.** Effects of pH on the degradation characteristics of DZ with different granule size ranges.

| pH | Granule size range (μm) | Rate constant (k) | Half-life ( $t_{1/2}$ ) | $r^2$  |
|----|-------------------------|-------------------|-------------------------|--------|
| 5  | >400                    | 0.272±0.033 d     | 2.548                   | 0.8573 |
|    | 300-400                 | 0.326±0.023 d     | 2.126                   | 0.8920 |
|    | 100-300                 | 0.449±0.020 c     | 1.543                   | 0.9674 |
|    | <100                    | 0.553±0.019 b     | 1.253                   | 0.8992 |
|    | SD                      | 0.777±0.071 a     | 0.892                   | 0.9298 |
| 7  | >400                    | 0.308±0.009 b     | 2.250                   | 0.9362 |
|    | 300-400                 | 0.332±0.020 b     | 2.087                   | 0.9380 |
|    | 100-300                 | 0.469±0.022 b     | 1.479                   | 0.8983 |
|    | <100                    | 0.570±0.080 b     | 1.216                   | 0.8622 |
|    | SD                      | 0.857±0.006 b     | 0.809                   | 0.9923 |
| 9  | >400                    | 0.380± 0.027 c    | 1.809                   | 0.9040 |
|    | 300-400                 | 0.436±0.011 c     | 1.589                   | 0.9349 |
|    | 100-300                 | 0.650± 0.045 b    | 1.071                   | 0.9747 |
|    | <100                    | 0.780±0.074 b     | 0.888                   | 0.8675 |
|    | SD                      | 1.129±0.017 a     | 0.614                   | 0.8850 |

SD = DZ in acetone. Means (N = 3) within the same column followed by the same letter are not statistically different (P < 0.05) according to Duncan's new Multiple-Range test.

**Table S5.** MITC released over time from DZ at different DZ dosages.

| Time (d) | Concentration of MITC (mg/L) |               |                |
|----------|------------------------------|---------------|----------------|
|          | 360 mg/kg                    | 180 mg/kg     | 90 mg/kg       |
| 0.08     | 3.68±0.3596 a                | 2.19±0.3026 b | 3.41±0.2311 a  |
| 0.33     | 5.90±0.6927 a                | 4.49±0.4102 b | 3.63±0.3142 c  |
| 0.5      | 7.12±0.4761 a                | 3.93±0.6725 b | 3.72±0.4069 b  |
| 1        | 7.67±0.5484 a                | 4.74±0.5921 b | 4.17±0.3808 b  |
| 1.5      | 8.47±0.6394 a                | 5.09±0.7795 b | 4.51±0.4811 b  |
| 2        | 9.11±0.5673 a                | 6.28±0.7264 b | 4.10±0.5760 c  |
| 3        | 10.63±0.6651 a               | 6.46±0.5774 b | 3.88±0.3256 c  |
| 5        | 12.22±0.8285 a               | 7.12±0.6012 b | 5.10±0.4392 c  |
| 6        | 15.97±1.2654 a               | 9.26±0.4725 b | 5.55±0.4316 c  |
| 8        | 14.20±0.9098 a               | 8.65±0.3400 b | 5.26± 0.8082 c |
| 10       | 16.22±1.0332 a               | 8.19±0.4807 b | 5.17±0.5707 c  |

Means (N = 3) within the same column followed by the same letter are not statistically different (P < 0.05) according to Duncan's new Multiple-Range test.

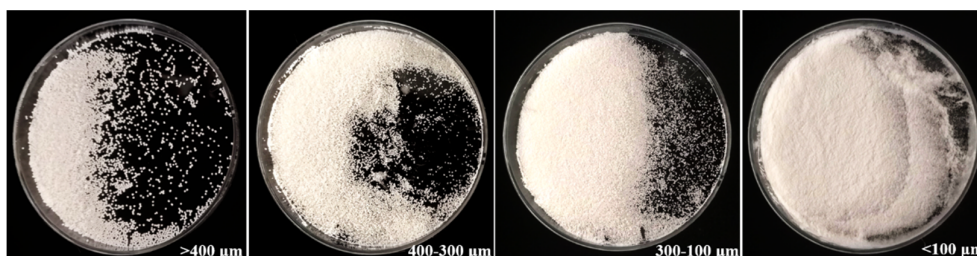

**Figure S1.** Image of DZ with different granule size ranges.

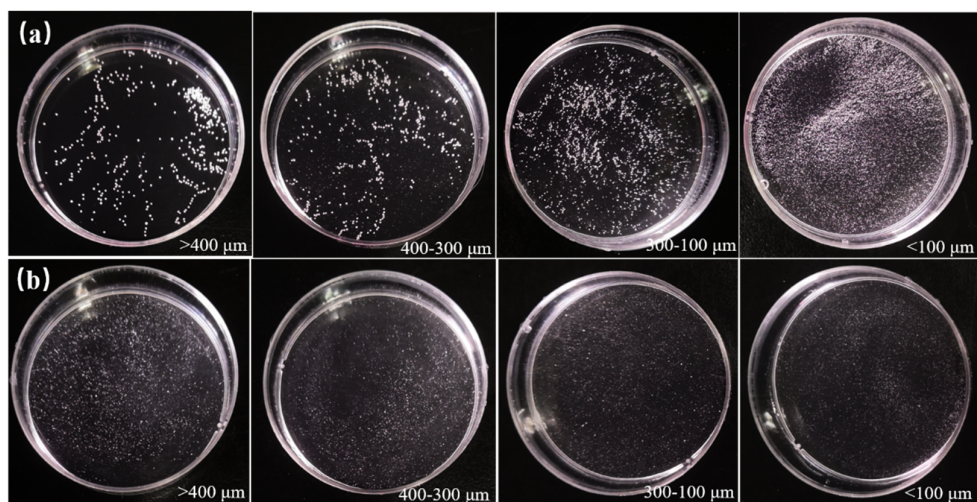

**Figure S2.** Dissolution of DZ in different granule size ranges in water for 5 days at 4 °C (a) and 35 °C (b).

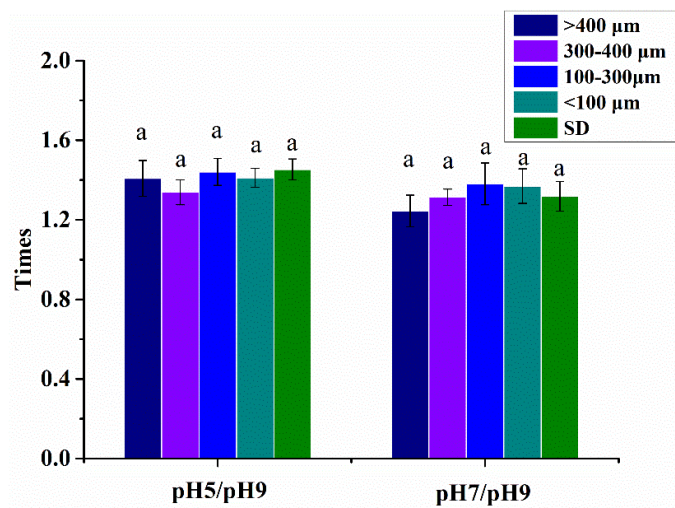

**Figure S3.** Comparison of DZ half-life values at pH 5 and pH 7 compared to pH 9. Different letters within the same graph indicate a significant difference at  $p < 0.05$  level by Duncan's new multiple range test.
